# Supplementary material
Source: PubMed Central journal article supplement (PMC6924174)

# A Supplementary Figure 1

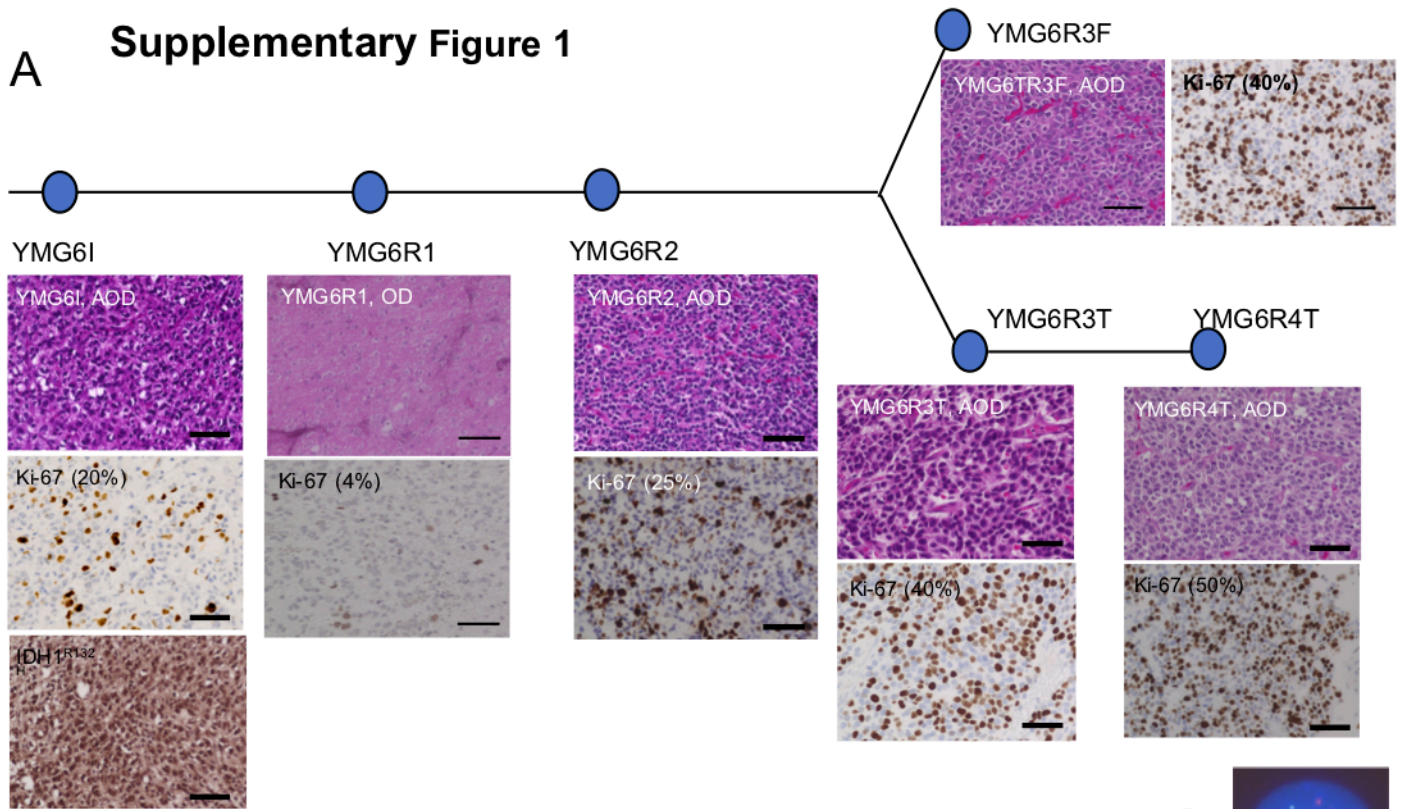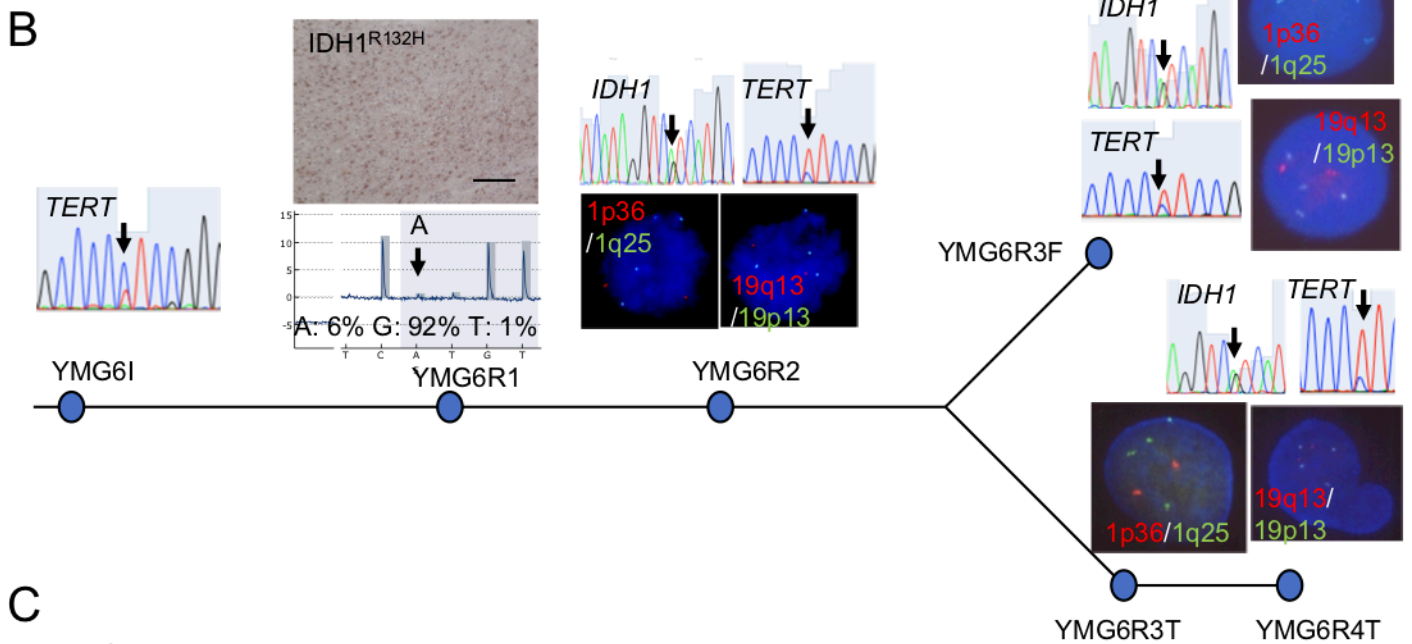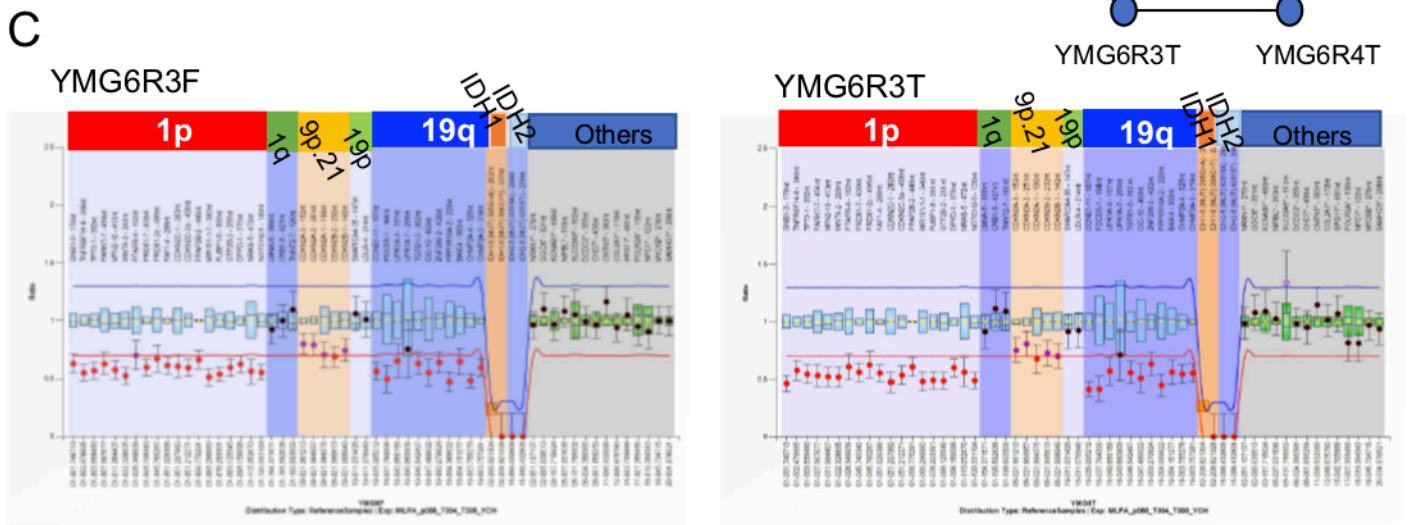

# Supplementary Figure 2

YMG6R3F

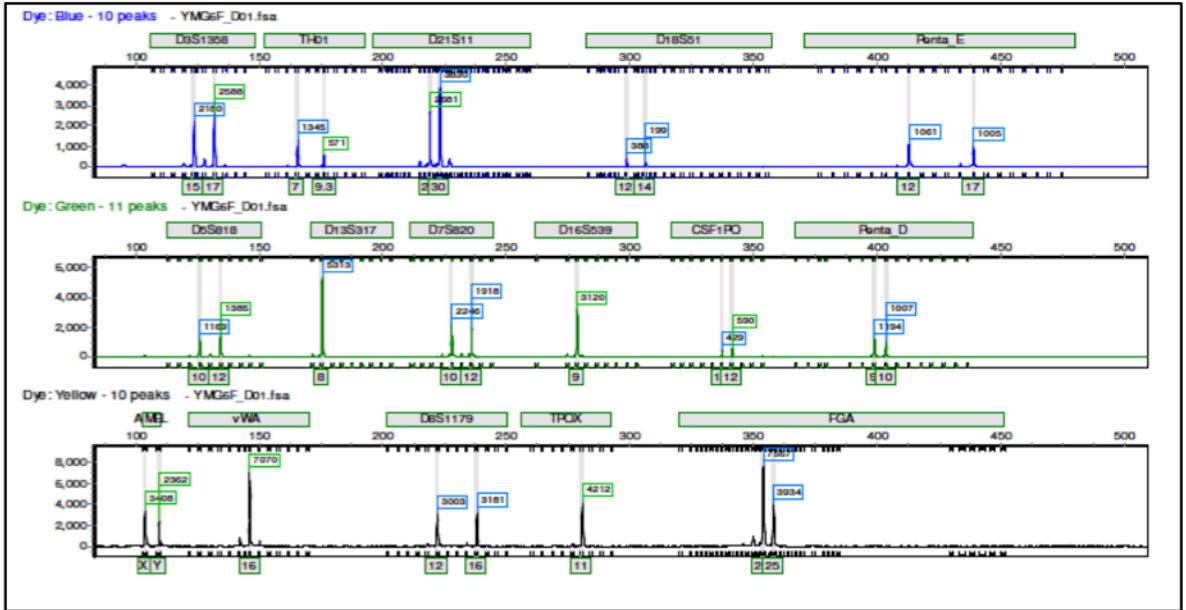

YMG6R3T

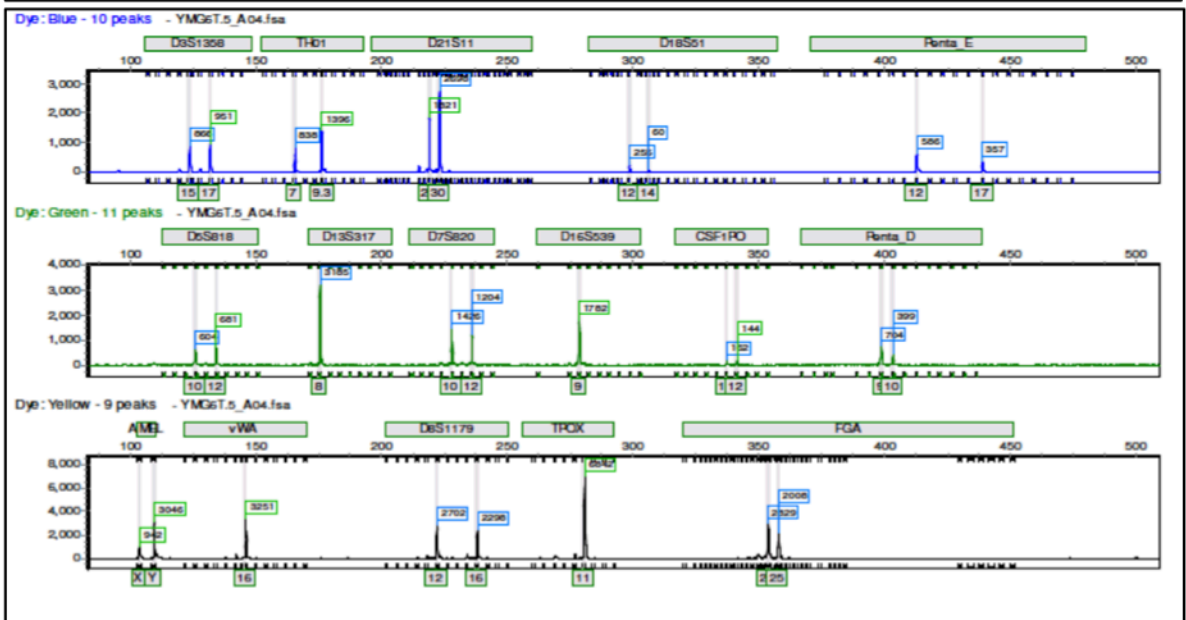

YMG6R3T  
sc1

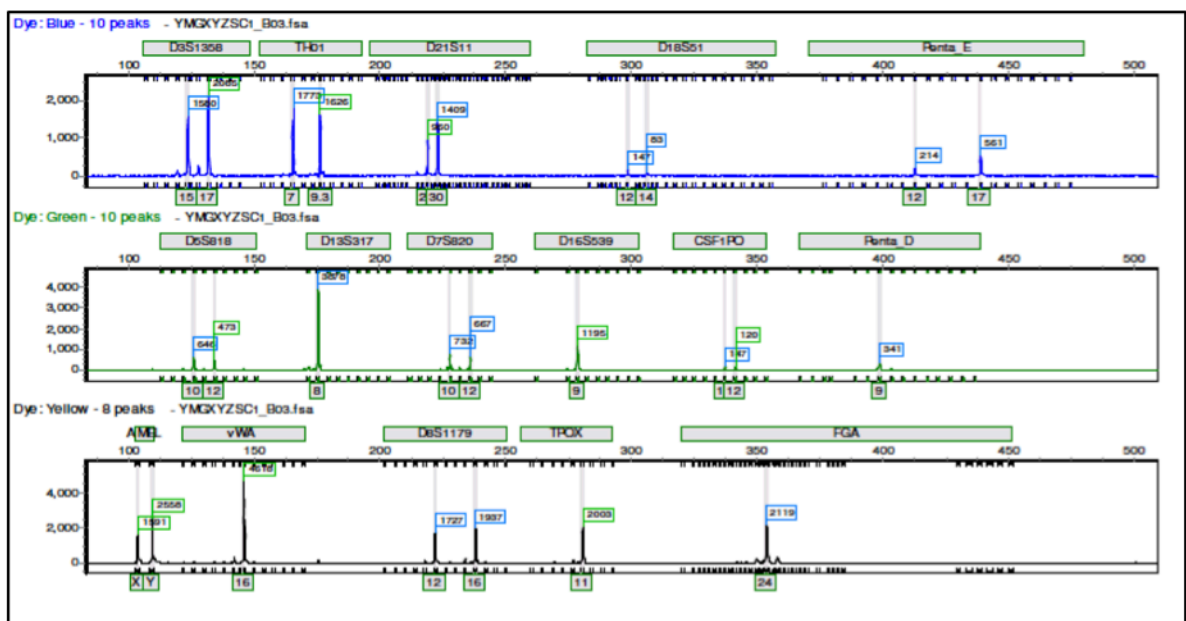



### Supplementary Figure 3

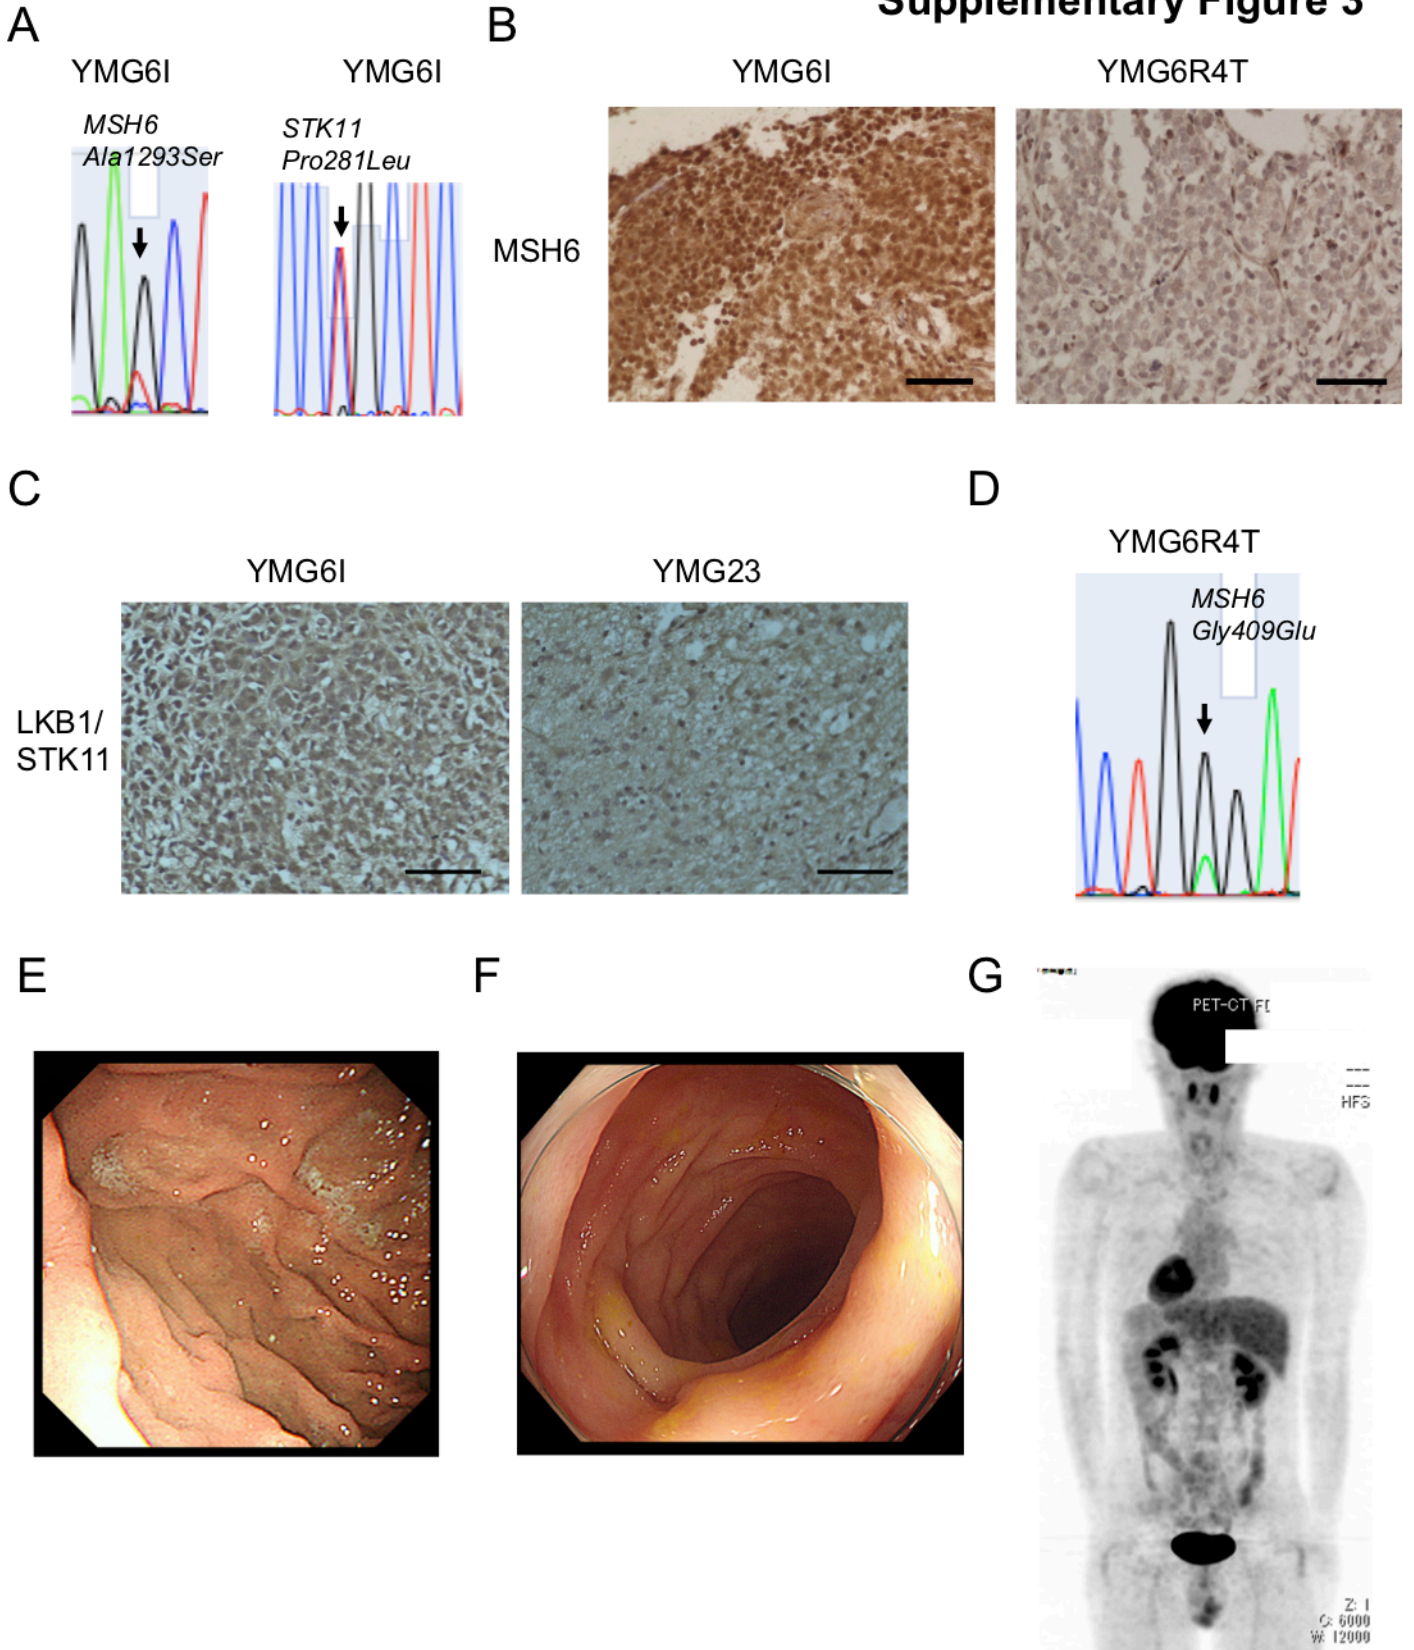

# Supplementary Figure 4

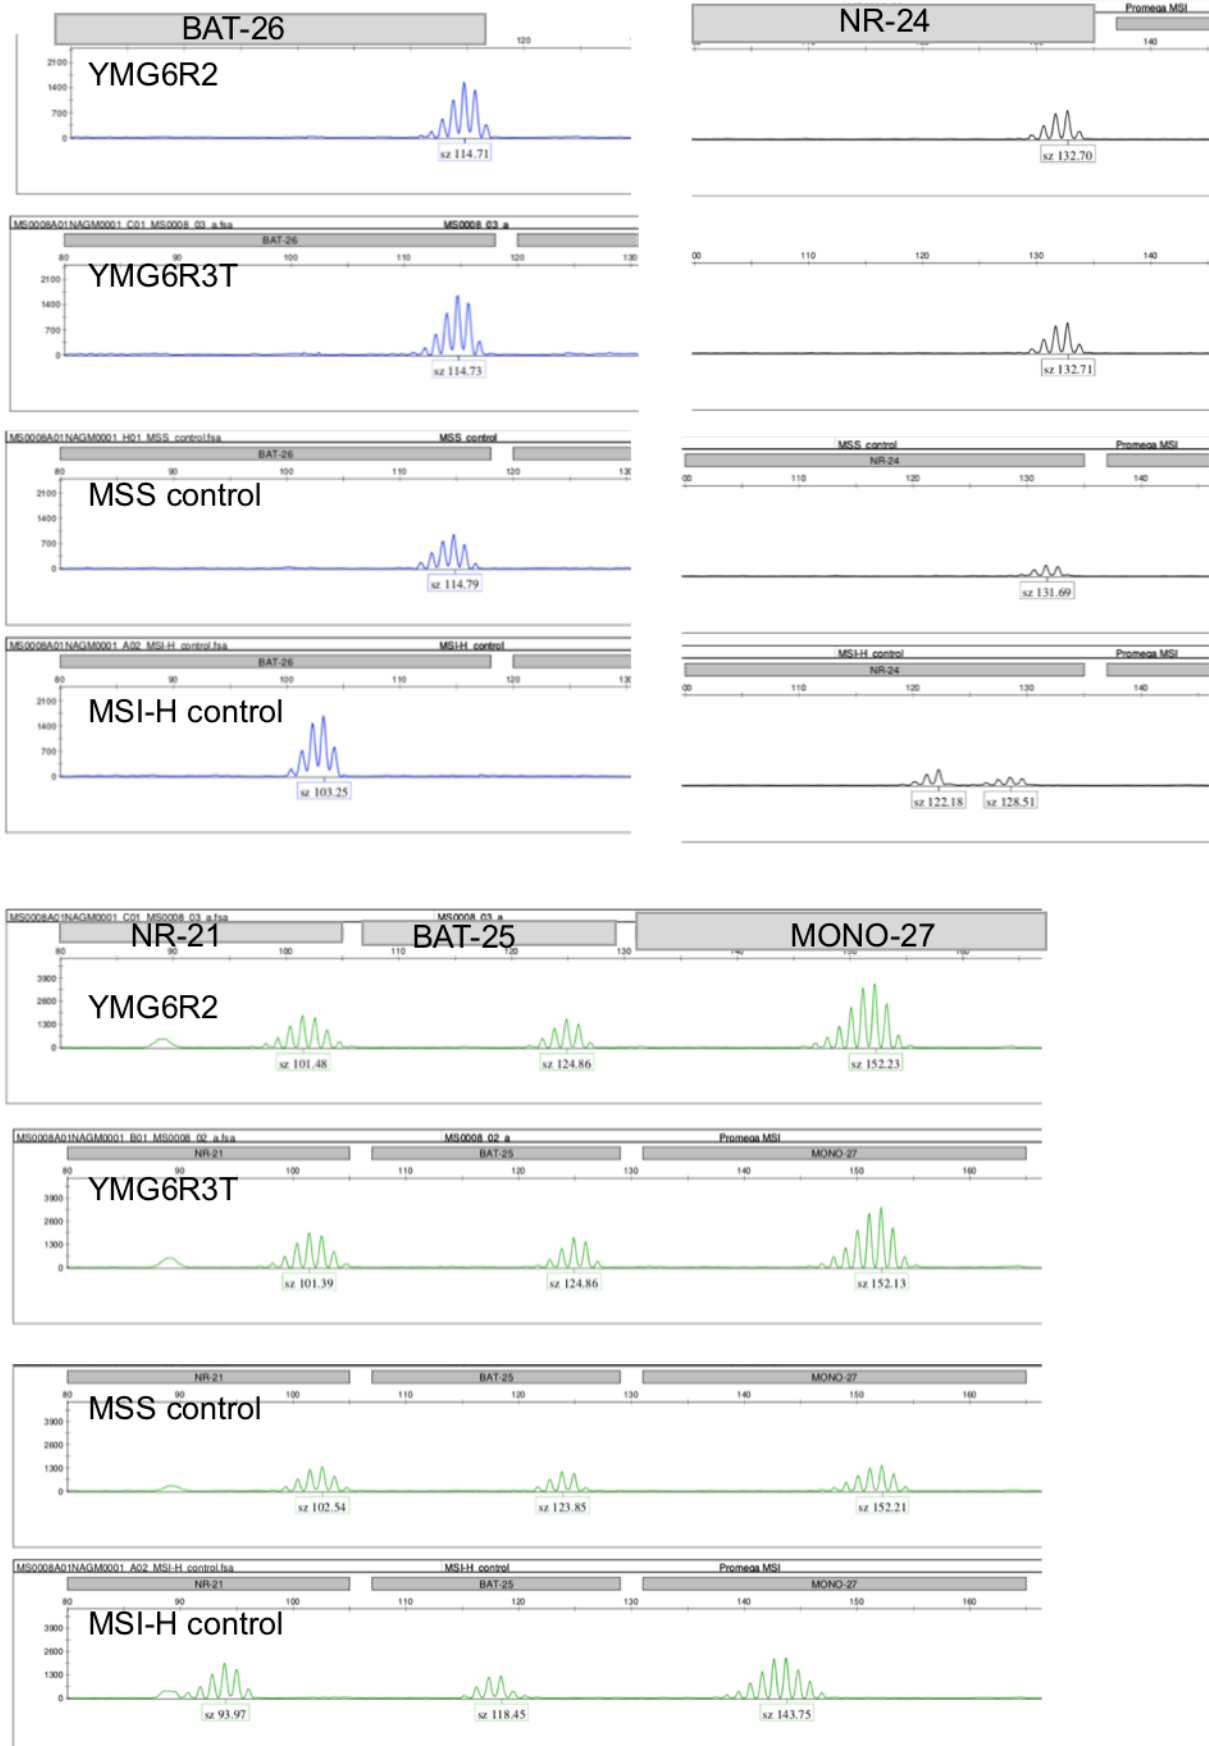



# Supplementary Figure 5

YMG6R3T

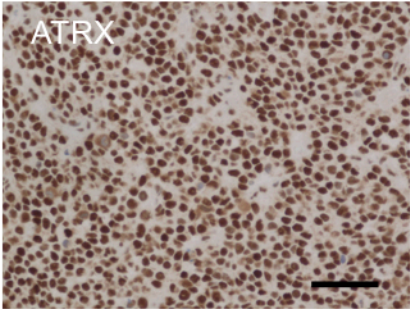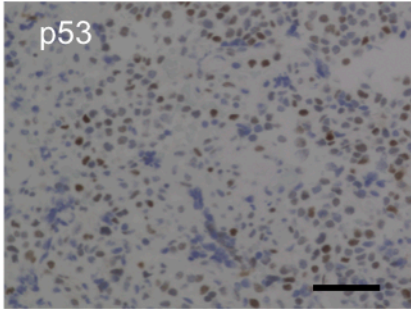

# Supplementary Figure 6

A

*PIK3CA*<sup>E542K</sup> (c.1624G>A)

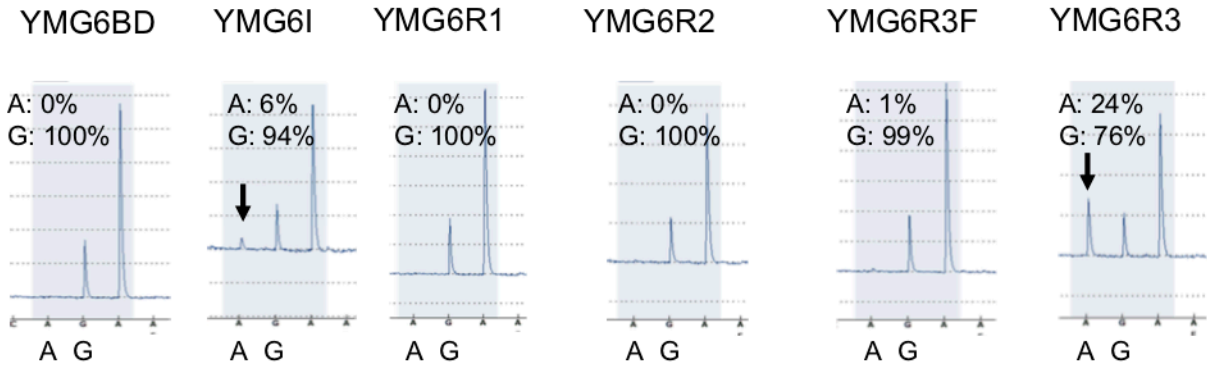

B

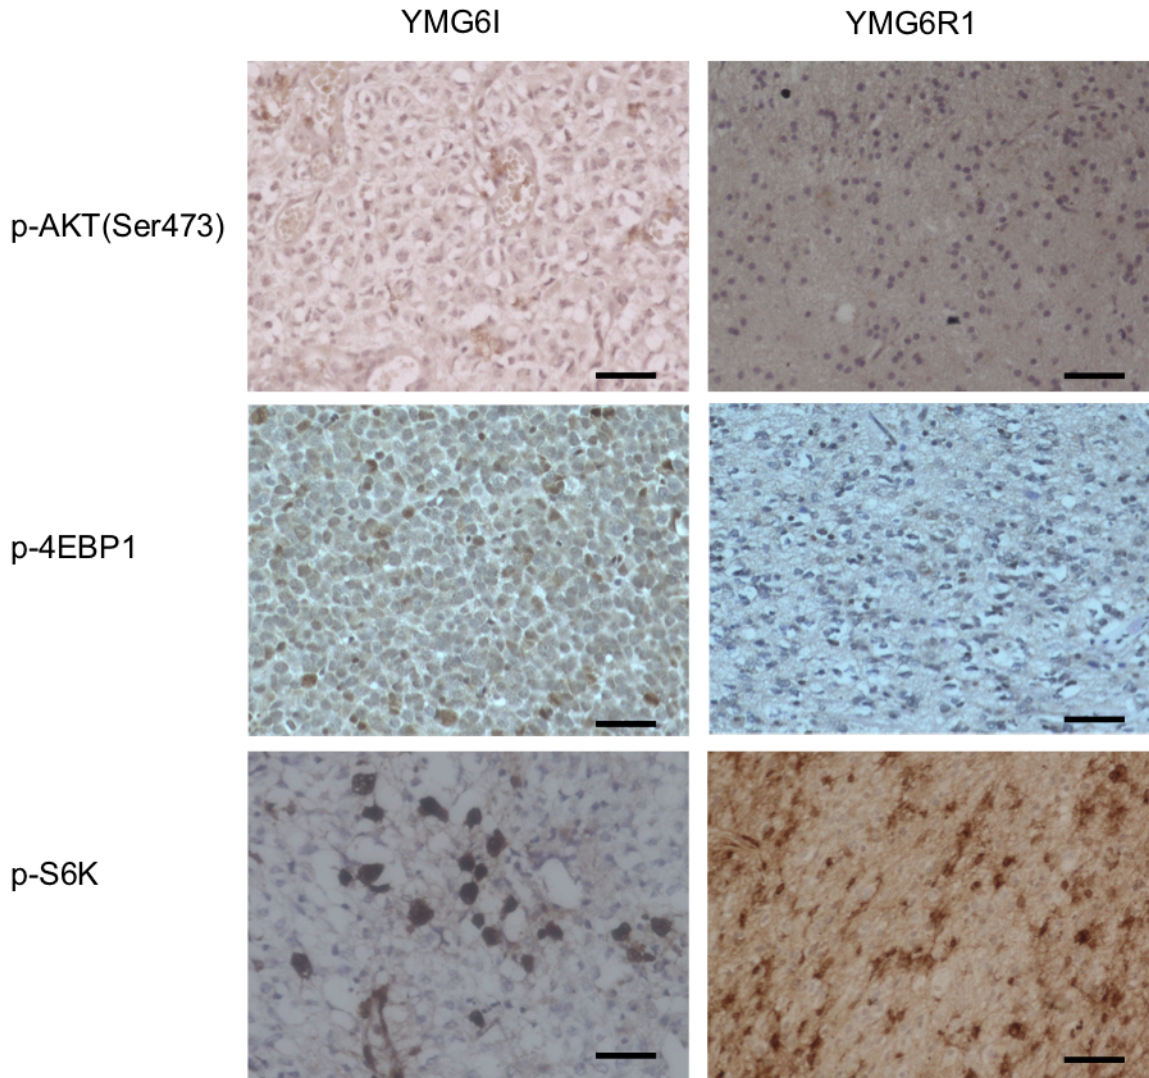

# Supplementary Figure 7

A

YMG6R3Tsc1

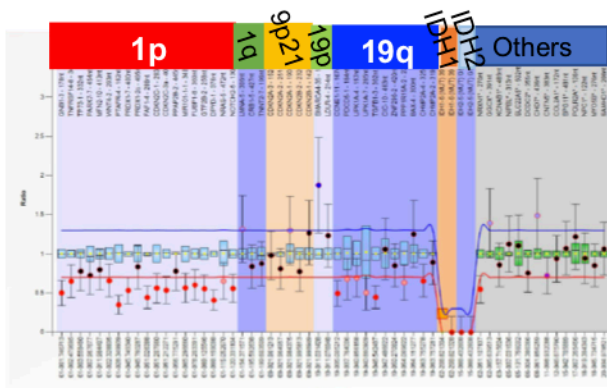

B

YMG6R4Tsc1

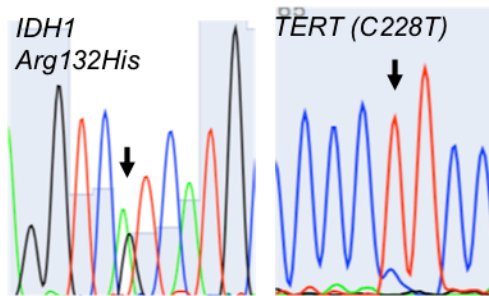



Supplementary Figure 8

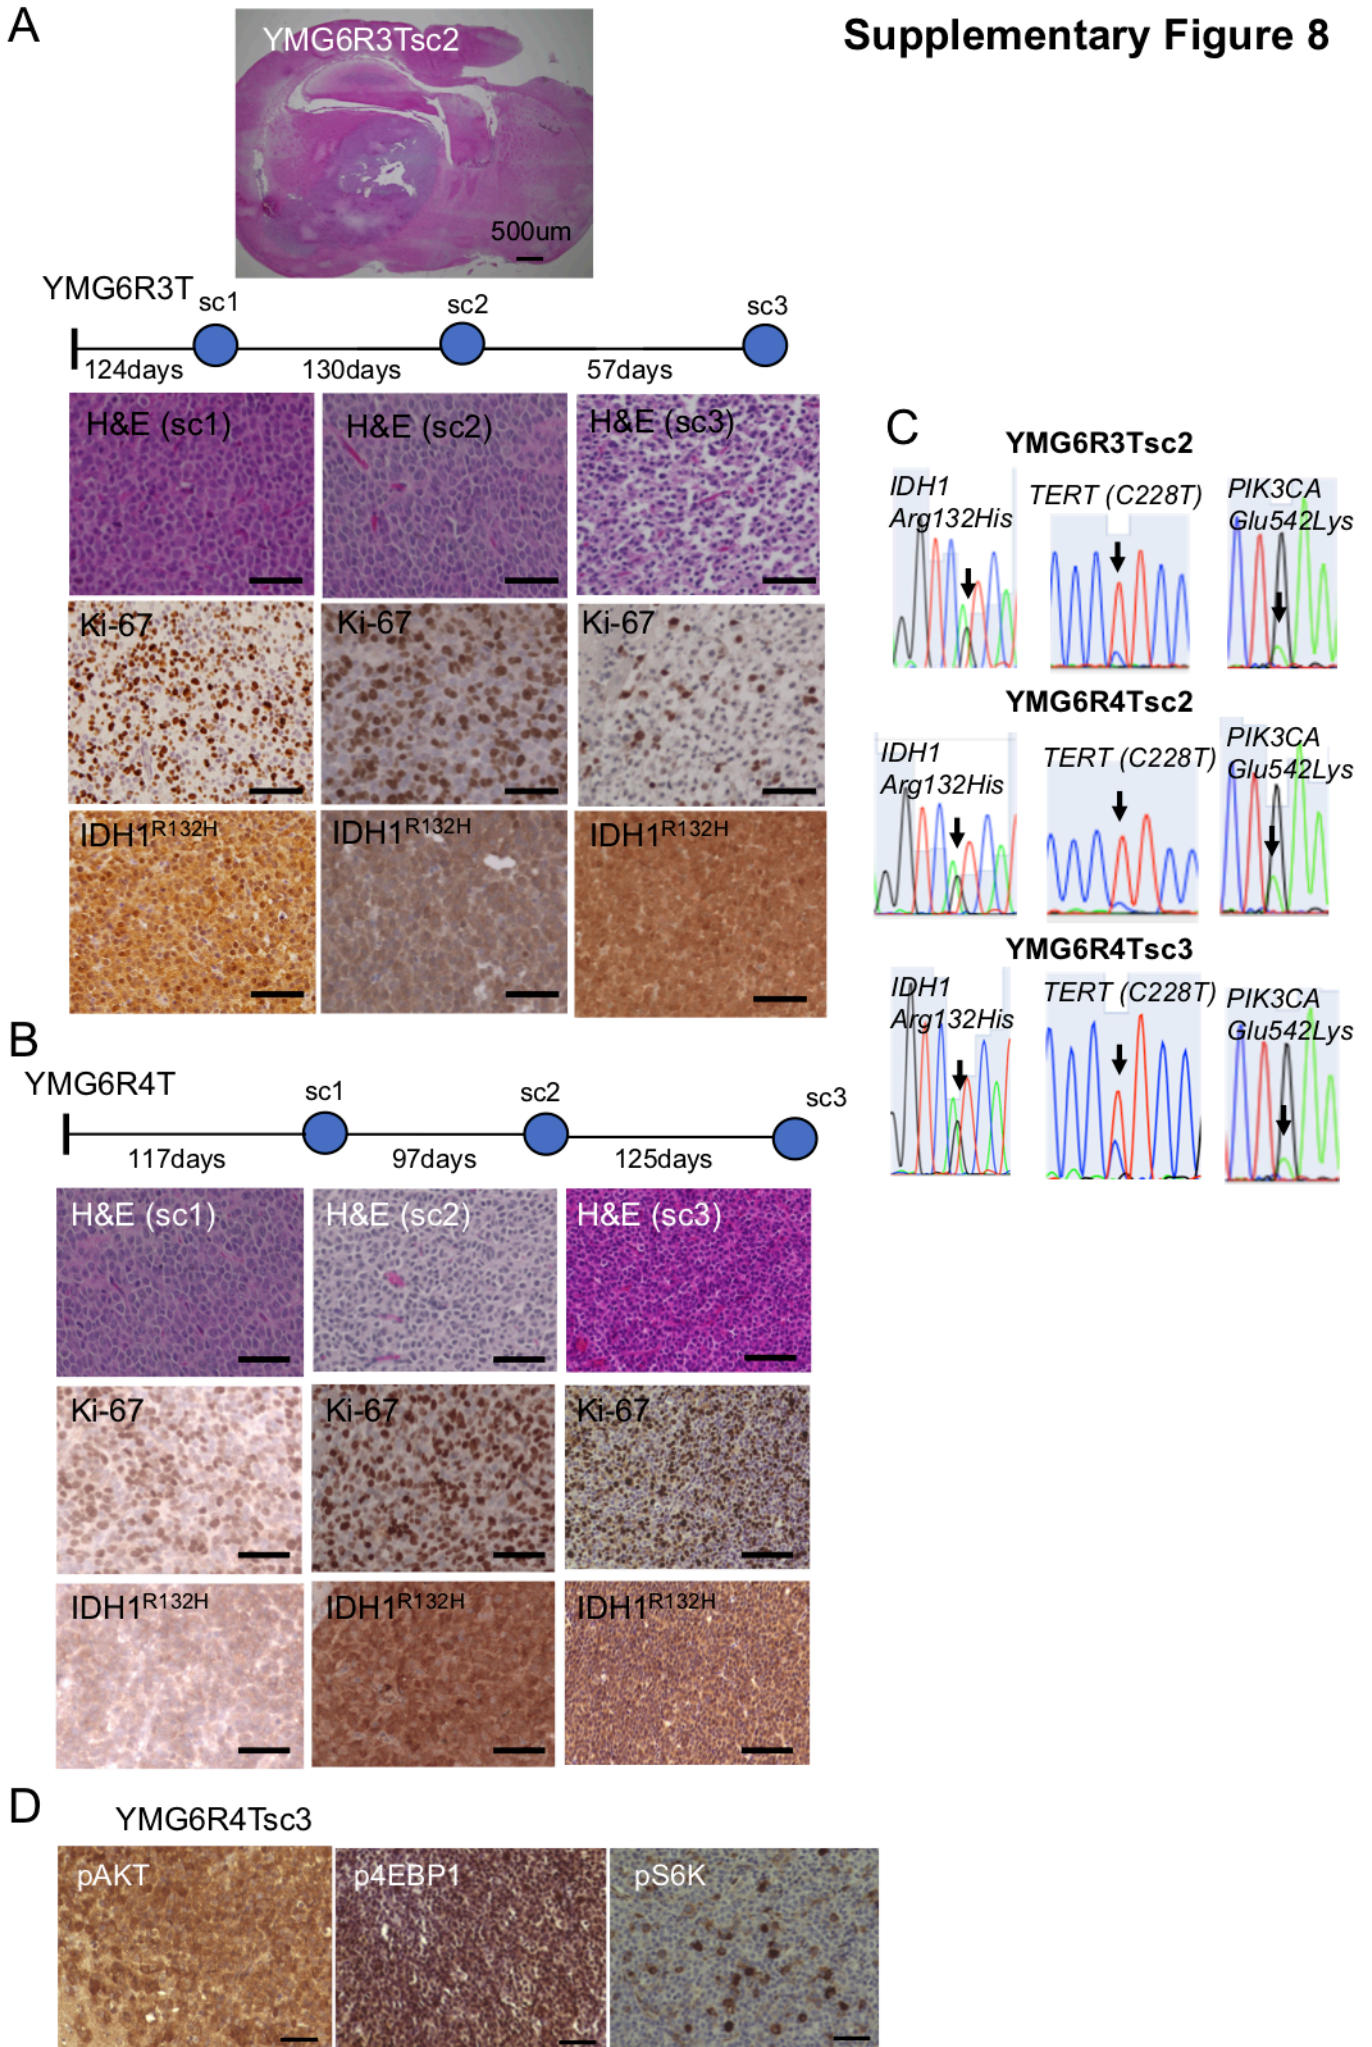

# Supplementary Figure 9

**A**

YMG23

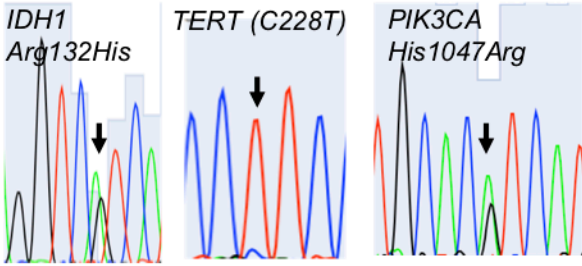

**B**

p16INK4a/CDKN2A

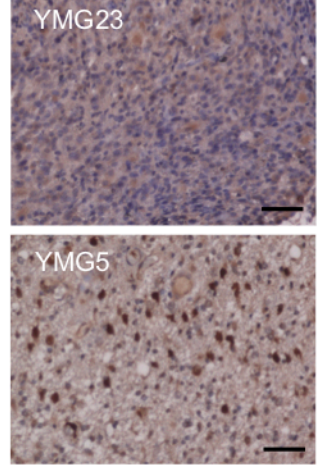

**C**

YMG5

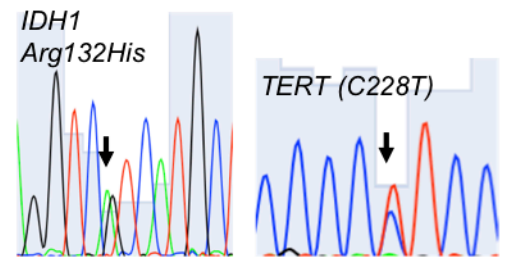

**D**

YMG23 sc1

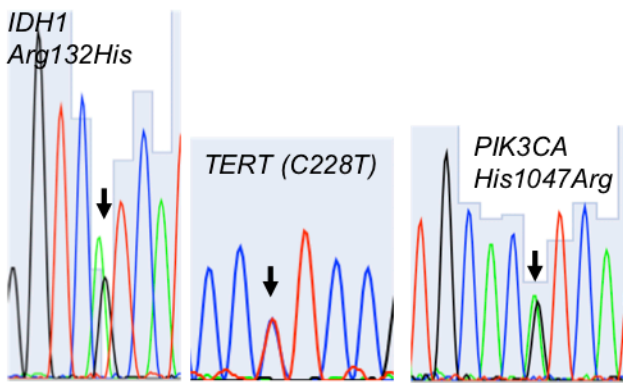

**E**

YMG23sc1

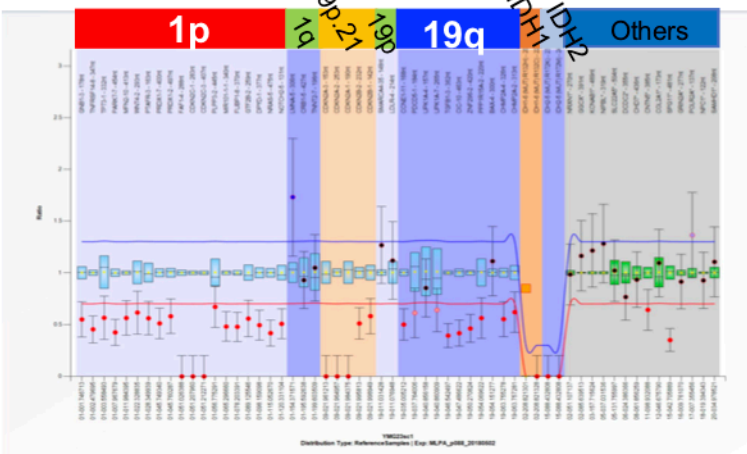

**F**

P16INK4a  
CDKN2A

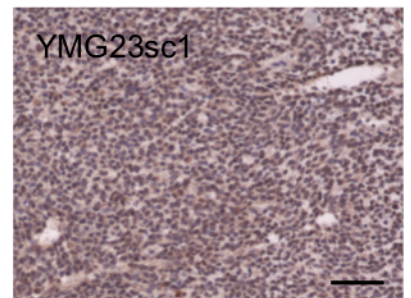



# Supplementary Figure 10

A

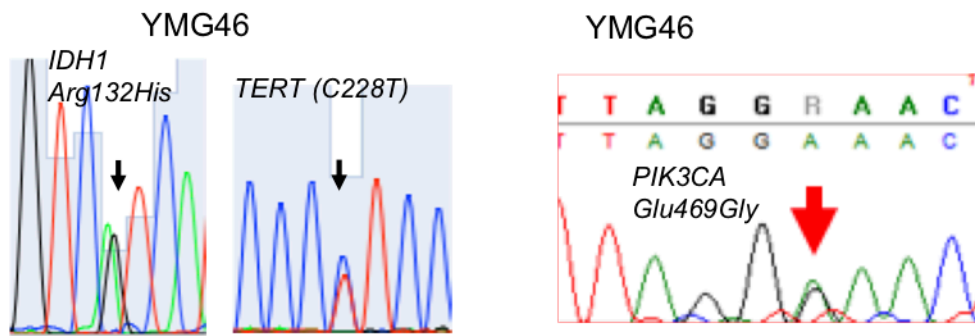

B

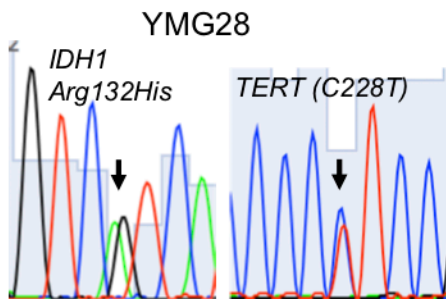

C

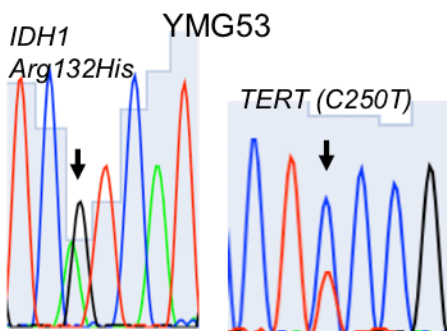

D

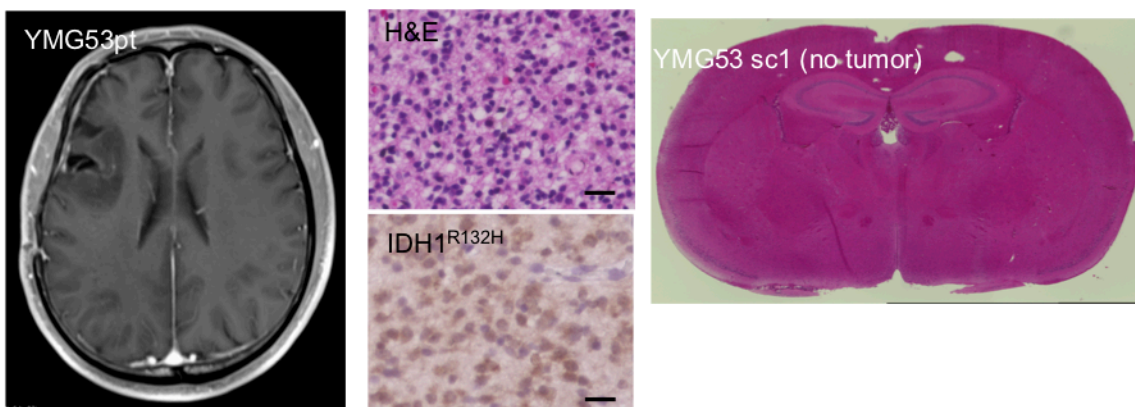



# Supplementary Figure 11

A

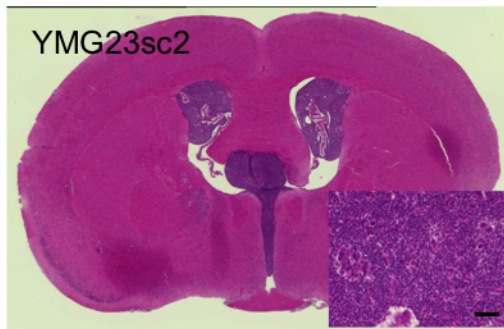

B

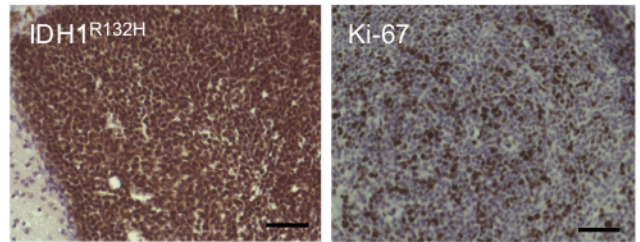

C

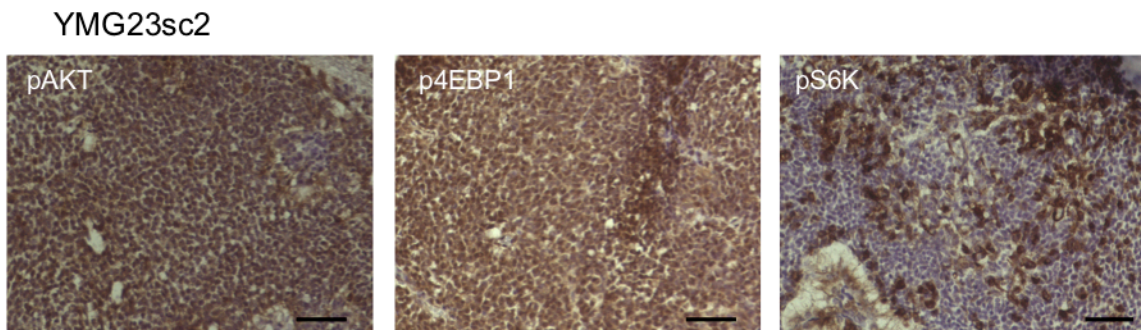

D

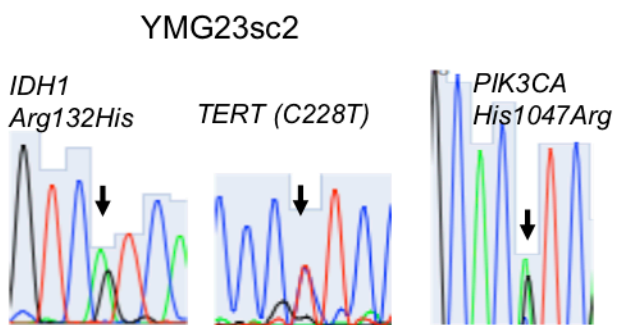

## Supplementary Figure 12

**A** YMG23 (AOD, *MGMT* unmethylated, *PIK3CA*<sup>His1047Arg</sup>)

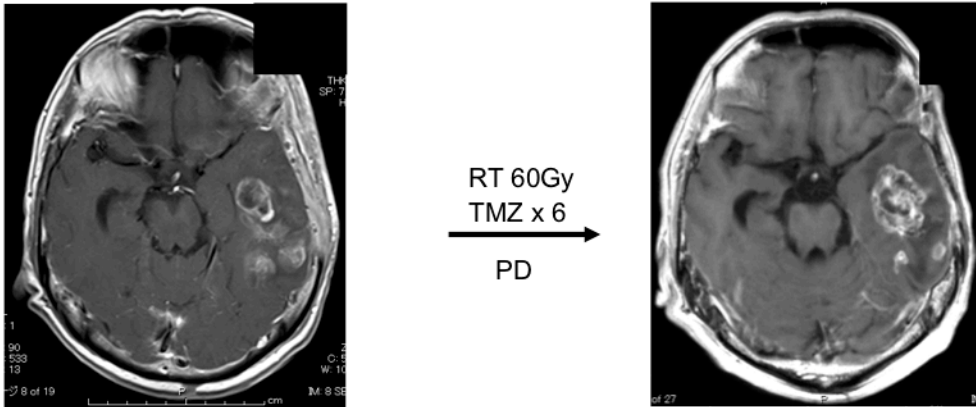

**B** YMG14 (GBM, *IDH* wild-type, *MGMT* unmethylated)

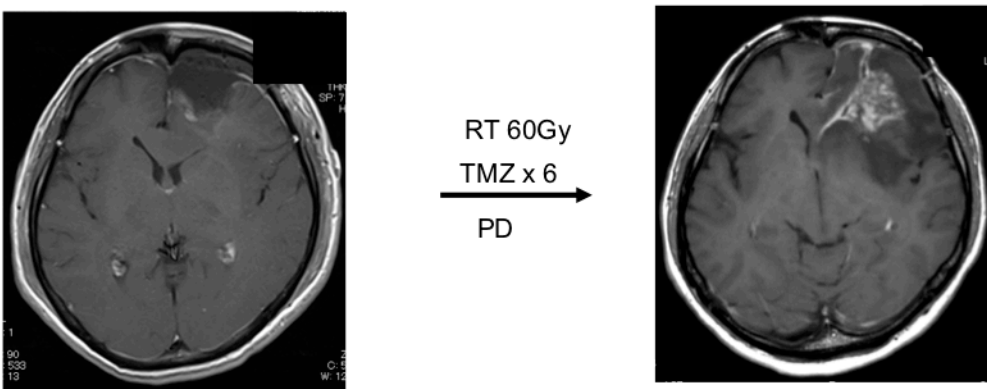

**C** YMG5 (AOD, *MGMT* methylated, *PIK3R1*<sup>Ile57AsnfsTer31</sup>)

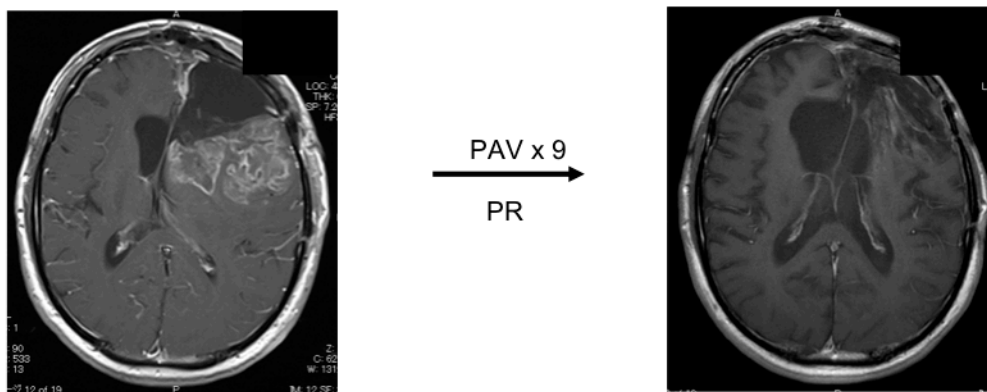

**D** MGG137 (AOD, *MGMT* methylated), *mTORSer2215Phe*)

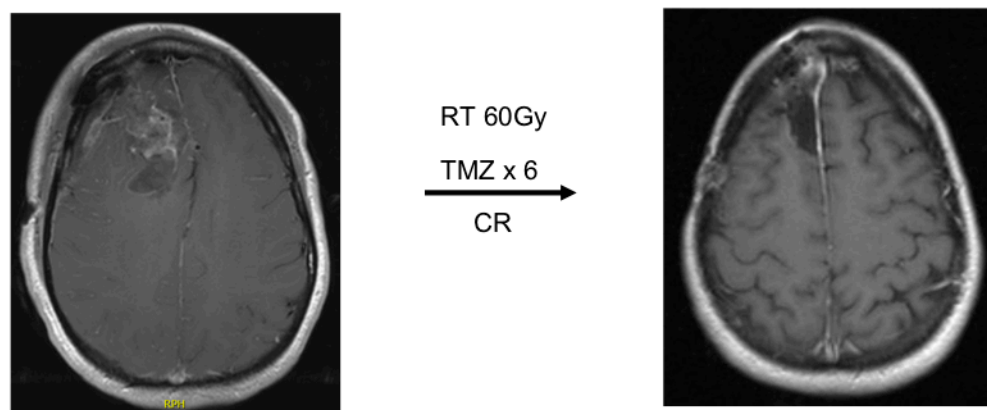

Supplementary Figure 13

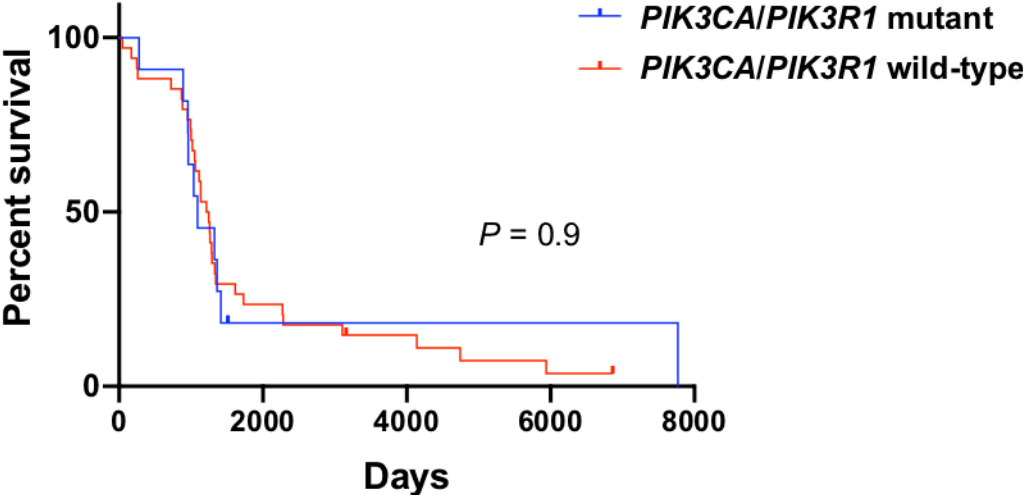



# Supplementary Figure 14

A

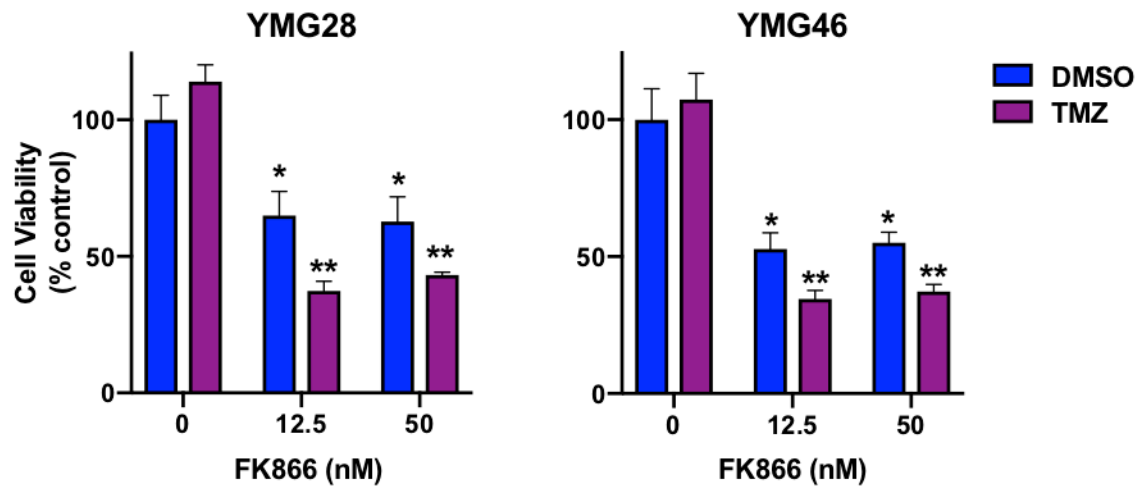

B

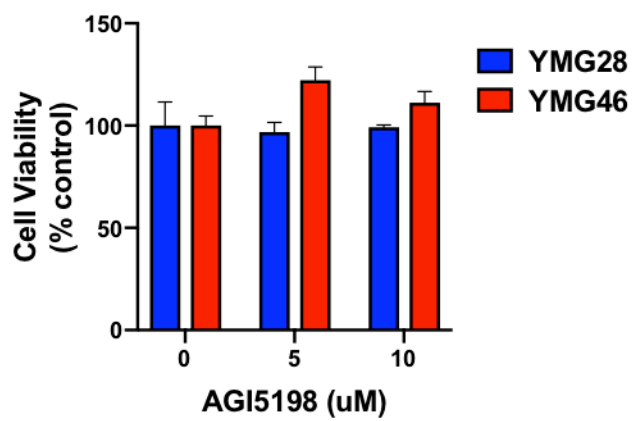

Supplement: NIHMS1527044-supplement-1.pdf [file NIHMS1527044-supplement-1.pdf]
